# Supplementary material
Source: Springer Nature journal article supplement (https://www.springermedizin.de/resource/supplementary/12885_2011_2746_MOESM3_ESM.pdf/9461870)

**A** **U266**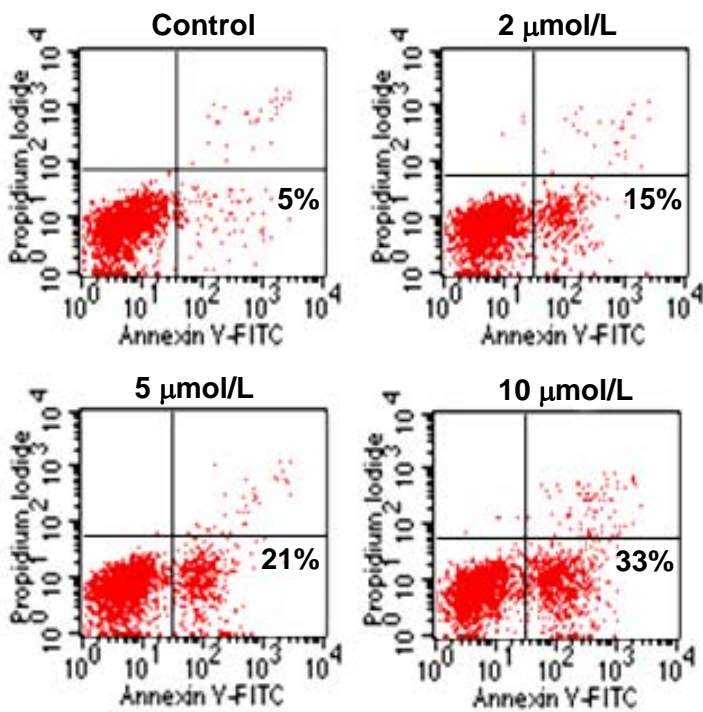**B** **RPMI8226**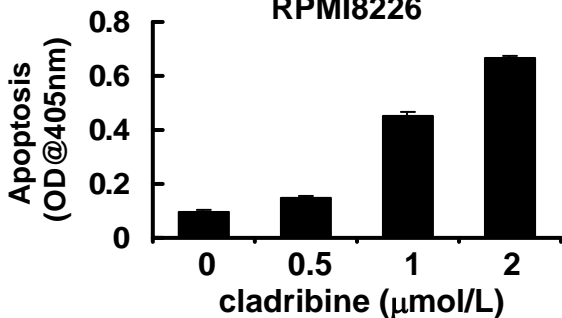**C** **MM1.S**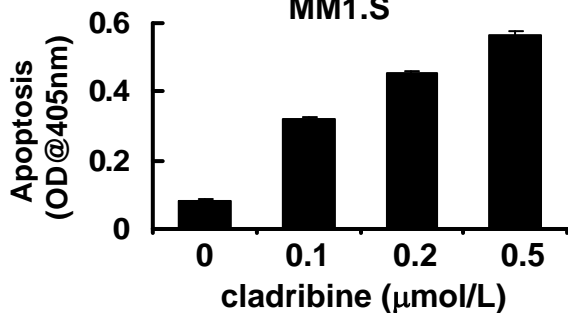

Supplement: MOESM3 [file 9461870]
